# Supplementary material for: Development and validation of impact of early integration of palliative care and oncology(IEI PCO) questionnaire: a survey for medical oncologists and nurses
Source: PubMed Central journal article supplement (PMC11046835; doi:10.1186/s12904-024-01435-1), 2024-04-26
Supplement: 12904_2024_1435_MOESM1_ESM.pdf [file 12904_2024_1435_MOESM1_ESM.pdf]

## Appendix (1) Criteria of Referral to Palliative Care V2

### The criteria for patient referral to inpatient palliative-care consultation:(1-4)

- 1) Any Cancer Patient With Moderate To Severe Symptom regardless cancer stage.
- 2) Stage III Lung Or Pancreatic Cancer
- 3) Stage IV Cancer
- 4) Prior Hospitalization Within 30 Day (Excluding Routine Chemotherapy)
- 5) Hospitalization For Longer Than 7 Days;
- 6) Uncontrolled Symptoms, Including Pain, Nausea, Vomiting, Dyspnoea, Delirium, And Psychosocial Distress.
- 7) Decreased Eastern Cooperative Oncology Group (ECOG) performance status  $\geq 3$
- 8) The presence of one or more serious comorbid diseases that are also associated with poor prognosis.
- 9) The presence of complex care requirements (e.g. functional dependency; complex home support for antibiotics or feedings)
- 10) The presence of complex situation of relatives, e.g. small children involved, functional dependence and acute illness of primary care provider.

### Identifying patients with unmet palliative-care needs who would benefit from an outpatient consultation. The criteria for referral to an outpatient consultation include: (5-7)

- a) In the context of early integration; it is always advised to refer any cancer patient from day 1 diagnosis to palliative care OPD.
- b) the presence of metastatic or locally advanced cancer;
- c) Any Cancer Patient With Moderate To Severe Symptom regardless cancer stage.
- d) Decreased Eastern Cooperative Oncology Group (ECOG) performance status.
- e) The presence of one or more serious complication of advanced-stage cancer that is associated with a prognosis of less than 12 months.
- f) The presence of one or more serious comorbid diseases that are also associated with poor prognosis.
- g) The presence of complex situation of relatives, e.g. small children involved, functional dependence and acute illness of primary care provider.
- h) Repeated ER visits

***Generally palliative-care referral tailored to the local healthcare system and resource availability. (7)***

#### **References:**

- 1) Weissman DE, Meier DE. Identifying patients in need of a palliative care assessment in the hospital setting: a consensus report from the Center to Advance Palliative Care. *Journal of Palliative Medicine*. 2011; 14:17–23. [PubMed: 21133809]
- 2) Center to Advance Palliative Care. Center to Advance Palliative Care; New York: 2015. <https://www.capc.org/Last> Last accessed: October 6, 2015
- 3) Adelson K, Paris J, Smith CB, Horton J, Morrison SR. Standardized criteria for required palliative care consultation on the solid tumor oncology service. *American Society of Clinical Oncology Quality Care Symposium*. 2013 Abstract 37 (*J Clin Oncol*, San Diego).
- 4) Gärtner J, Daun M, Wolf J, von Bergwelt-Baildon M, Hallek M. Early Palliative Care: Pro, but Please Be Precise! *Oncol Res Treat*. 2019;42(1-2):11-18. doi: 10.1159/000496184. Epub 2019 Jan 26. PMID: 30685764.
- 5) Glare P, et al. Study using the NCCN guidelines for palliative care to screen patients for palliative care needs and referral to palliative care specialists. *J Natl Compr Canc Netw*. 2013; 11:1087–96. [PubMed: 24029124]
- 6) Glare PA, Semple D, Stabler SM, Saltz LB. Palliative care in the outpatient oncology setting: evaluation of a practical set of referral criteria. *J Oncol Pract*. 2011; 7:366–70. [PubMed: 22379418]
- 7) Glare PA, Chow K. Validation of a Simple Screening Tool for Identifying Unmet Palliative Care Needs in Patients With Cancer. *J Oncol Pract*. 2015; 11:e81–86.
- 8) Hui D, Bruera E. Integrating palliative care into the trajectory of cancer care. *Nat Rev Clin Oncol*. 2016 Mar;13(3):159-71. doi: 10.1038/nrclinonc.2015.201. Epub 2015 Nov 24. PMID: 26598947; PMCID: PMC4772864.
