# Supplementary material for: Development and validation of impact of early integration of palliative care and oncology(IEI PCO) questionnaire: a survey for medical oncologists and nurses
Source: PubMed Central journal article supplement (PMC11046835; doi:10.1186/s12904-024-01435-1), 2024-04-26
Supplement: 12904_2024_1435_MOESM2_ESM.pdf [file 12904_2024_1435_MOESM2_ESM.pdf]

## Appendix (2): Impact of Early Integration of Palliative Care and Oncology (IEI PCO survey)

**Participant number:**

### Section I: Socio-demographic Data

- |                                                                                                                                                                                                                                    |                                                                                                                                                                                                                  |
|------------------------------------------------------------------------------------------------------------------------------------------------------------------------------------------------------------------------------------|------------------------------------------------------------------------------------------------------------------------------------------------------------------------------------------------------------------|
| <p>1. Date of birth:.....</p> <p>2. Sex: .....</p> <p>3. Qualifications:.....</p> <p>4. Occupation:.....</p> <p>5. Place of work (department/unit):<br/>.....</p> <p>6. Working experience in oncology field (in years): .....</p> | <p>7. How much of your practice involves the care of patients with advanced (incurable) cancer?</p> <p>a. None</p> <p>b. A small proportion</p> <p>c. A substantial proportion</p> <p>d. Most of my practice</p> |
|------------------------------------------------------------------------------------------------------------------------------------------------------------------------------------------------------------------------------------|------------------------------------------------------------------------------------------------------------------------------------------------------------------------------------------------------------------|

### Section II: Palliative Care Education

- |                                                                                                                                                                                                                                                                                                                                                |                                                                                                                                                                                                                                                                            |
|------------------------------------------------------------------------------------------------------------------------------------------------------------------------------------------------------------------------------------------------------------------------------------------------------------------------------------------------|----------------------------------------------------------------------------------------------------------------------------------------------------------------------------------------------------------------------------------------------------------------------------|
| <p>8. Have you ever had any training in PC during your oncology fellowship/residency program?</p> <p>a) Yes</p> <p>b) No</p> <p>9. If the answer to Q8 is yes, then how long was the training course?</p> <p>a) 1 week or less</p> <p>b) 1 month</p> <p>c) 6 weeks or more</p> <p>10. What type of training/qualification completed in PC?</p> | <p>a) Master</p> <p>b) Course</p> <p>c) Lectures</p> <p>d) Non</p> <p>11. Was the training course relevant to your practice?</p> <p>a) Yes</p> <p>b) No</p> <p>12. Do you agree that PC should be a part of postgraduate oncology training?</p> <p>a) Yes</p> <p>b) No</p> |
|------------------------------------------------------------------------------------------------------------------------------------------------------------------------------------------------------------------------------------------------------------------------------------------------------------------------------------------------|----------------------------------------------------------------------------------------------------------------------------------------------------------------------------------------------------------------------------------------------------------------------------|

*PC: Palliative Care*

/6 =

### Section III: The Structure of clinical practice and the process of care

1) Do you agree with the following statements about the structure of the process of care of PCO?

|                                                                                                                                              | Strongly disagree | Disagree | Don't know | Agree | Strongly agree |
|----------------------------------------------------------------------------------------------------------------------------------------------|-------------------|----------|------------|-------|----------------|
| a) All cancer centers must have PC services.                                                                                                 |                   |          |            |       |                |
| b) Cancer patients should be seen by PMT even if they are on anti-tumor therapies.                                                           |                   |          |            |       |                |
| c) Integrating all units of oncology with PC services has great impact on overall patients' care and QoL.                                    |                   |          |            |       |                |
| d) Process of PCO integration should take place in a structured way through departmental organizations, regular meeting and cases discussion |                   |          |            |       |                |

|                                                                                                    |  |  |  |  |  |
|----------------------------------------------------------------------------------------------------|--|--|--|--|--|
| e) Professional communication between oncology staff and PMT is essential for patient' care.       |  |  |  |  |  |
| f) Case discussion between PMT and oncologists increased oncologists' experience in holistic care. |  |  |  |  |  |

PC: Palliative Care, PMT: Palliative Medicine team, QoL: Quality of Life, PCO: Palliative Care and Oncology.

2) What are models for the delivery of simultaneous oncology and PC at your oncology center? **/8**  
**(check all that apply)**

|                                                               | Before integration | After integration |
|---------------------------------------------------------------|--------------------|-------------------|
| a) Inpatient PC consultation service                          |                    |                   |
| b) Regular palliative care outpatient clinic                  |                    |                   |
| c) On-demand joint oncology-palliative care outpatient-clinic |                    |                   |
| d) Palliative care unit                                       |                    |                   |
| e) Weekends and holidays PMT inpatient ward round             |                    |                   |
| f) 24/7 phone calls for continuity of care                    |                    |                   |
| g) Standalone PCC with 24h services                           |                    |                   |
| h) Community-based palliative care or home health care        |                    |                   |

PCC: Palliative Care Centre, PC: Palliative Care, PMT: Palliative Medicine team

3) **Regarding Inpatient Consultation Service**

I. Does your Centre have a dedicated PMT consultation service? 3. Yes 0. No

II. Is the patient seen in the same day upon consultation?

3. All of the time 2. Mostly

1. Rarely 0. No

**/3**

4) **Regarding Palliative Care Outpatient Clinic**

Is the patient seen in **same day in the OPD upon** demand of the oncologists?

3. All of the time 2. Mostly

2. Rarely 0. No

**Regarding discharge planning and continuity of care**

**/4**

|                                                                                 | Strongly disagree | Disagree | Don't know | Agree | Strongly agree |
|---------------------------------------------------------------------------------|-------------------|----------|------------|-------|----------------|
| a) Adequate quantities of symptom control medications provided during discharge |                   |          |            |       |                |
| b) Follow-up plan provided during discharge                                     |                   |          |            |       |                |
| c) After hours support provide                                                  |                   |          |            |       |                |
| d) Preferred place of care discussed and facilitated                            |                   |          |            |       |                |

**Section IV: Symptomatic Management**

/9

5) Do you agree with the following statements about the symptomatic management of cancer patients **before** and **after** PCO integration?

|                                                                                                              |               | Strongly disagree | Disagree | Don't know | Agree | Strongly agree |
|--------------------------------------------------------------------------------------------------------------|---------------|-------------------|----------|------------|-------|----------------|
| a) Physical, psychological, social and spiritual pain was properly managed                                   | <b>Before</b> |                   |          |            |       |                |
|                                                                                                              | <b>After</b>  |                   |          |            |       |                |
| b) Dyspnea and other respiratory symptoms were easy to manage                                                | <b>Before</b> |                   |          |            |       |                |
|                                                                                                              | <b>After</b>  |                   |          |            |       |                |
| c) Difficult cases of nausea and vomiting were well controlled                                               | <b>Before</b> |                   |          |            |       |                |
|                                                                                                              | <b>After</b>  |                   |          |            |       |                |
| d) Constipation and other GIT symptoms were underestimated and under treated                                 | <b>Before</b> |                   |          |            |       |                |
|                                                                                                              | <b>After</b>  |                   |          |            |       |                |
| e) Psychological issues (e.g. depression, insomnia and anxiety) were routinely assessed and properly managed | <b>Before</b> |                   |          |            |       |                |
|                                                                                                              | <b>After</b>  |                   |          |            |       |                |
| f) Delirium was easily identified and managed                                                                | <b>Before</b> |                   |          |            |       |                |
|                                                                                                              | <b>After</b>  |                   |          |            |       |                |
| g) Opioids initiation, titration, rotation and related side effects were properly managed                    | <b>Before</b> |                   |          |            |       |                |
|                                                                                                              | <b>After</b>  |                   |          |            |       |                |
| h) Symptoms were adequately controlled on discharge                                                          | <b>Before</b> |                   |          |            |       |                |
|                                                                                                              | <b>After</b>  |                   |          |            |       |                |
| i) Allowing for more effective delivery of oncological treatments through control of symptoms                | <b>Before</b> |                   |          |            |       |                |
|                                                                                                              | <b>After</b>  |                   |          |            |       |                |

*GIT: gastrointestinal tract, PCO: Palliative Care and Oncology*

**Section V: Communication with Patients and Family**

/5

6) Do you agree with the following statements about communication with patients and family **before** and **after** PCO integration?

|                                                                        |               | Strongly disagree | Disagree | Don't know | Agree | Strongly agree |
|------------------------------------------------------------------------|---------------|-------------------|----------|------------|-------|----------------|
| a) Repeated honest and accurate communication in a sensitive manner.   | <b>Before</b> |                   |          |            |       |                |
|                                                                        | <b>After</b>  |                   |          |            |       |                |
| b) Goals of care were discussed.                                       | <b>Before</b> |                   |          |            |       |                |
|                                                                        | <b>After</b>  |                   |          |            |       |                |
| c) Dealing more effectively with issues of ending active treatments.   | <b>Before</b> |                   |          |            |       |                |
|                                                                        | <b>After</b>  |                   |          |            |       |                |
| d) Conflicts among patient, family and medical team were resolved      | <b>Before</b> |                   |          |            |       |                |
|                                                                        | <b>After</b>  |                   |          |            |       |                |
| e) Higher patients' and families' acceptance of PC policy of transfer. | <b>Before</b> |                   |          |            |       |                |
|                                                                        | <b>After</b>  |                   |          |            |       |                |

*PCO: Palliative Care and Oncology*

**Section VI: End of Life Care**

17

7) Do you agree with the following statements about end-of-life care **before** and **after** the PCO?

|                                                                                                                 |               | Strongly disagree | Disagree | Don't know | Agree | Strongly agree |
|-----------------------------------------------------------------------------------------------------------------|---------------|-------------------|----------|------------|-------|----------------|
| a) End of life symptoms were effectively managed (e.g. delirium, pain, upper respiratory secretions)            | <b>Before</b> |                   |          |            |       |                |
|                                                                                                                 | <b>After</b>  |                   |          |            |       |                |
| b) Prognosis was communicated clearly to the family.                                                            | <b>Before</b> |                   |          |            |       |                |
|                                                                                                                 | <b>After</b>  |                   |          |            |       |                |
| c) Compassionate communication was regularly delivered to patient, family and medical staff                     | <b>Before</b> |                   |          |            |       |                |
|                                                                                                                 | <b>After</b>  |                   |          |            |       |                |
| d) Bereavement support was provided                                                                             | <b>Before</b> |                   |          |            |       |                |
|                                                                                                                 | <b>After</b>  |                   |          |            |       |                |
| e) Limitation of the role of life sustaining measures were discussed                                            | <b>Before</b> |                   |          |            |       |                |
|                                                                                                                 | <b>After</b>  |                   |          |            |       |                |
| f) Patient and family values, preferences and goals were discussed and incorporated into PC plan                | <b>Before</b> |                   |          |            |       |                |
|                                                                                                                 | <b>After</b>  |                   |          |            |       |                |
| g) Managing the place of death based on patient/family preference were discussed and declared (eg: ICU, home..) | <b>Before</b> |                   |          |            |       |                |
|                                                                                                                 | <b>After</b>  |                   |          |            |       |                |

PCO: Palliative Care and Oncology

**Section VII: Work burden**

17

8) Do you agree with the following statements regarding work burden **after** PCO integration?

|                                                                           |  | Strongly disagree | Disagree | Don't know | Agree | Strongly agree |
|---------------------------------------------------------------------------|--|-------------------|----------|------------|-------|----------------|
| a) The length of oncologists' visits to patients during rounds is reduced |  |                   |          |            |       |                |
| b) Number of patients' calls are less                                     |  |                   |          |            |       |                |
| c) Number of nurses' calls to the oncologists are less                    |  |                   |          |            |       |                |
| d) Number of patients' visits to causality are less                       |  |                   |          |            |       |                |
| e) Number of psychiatric and ICU consultations are less                   |  |                   |          |            |       |                |
| f) Duty hours became less stressful                                       |  |                   |          |            |       |                |
| g) I became more confident in dealing with patients' symptoms             |  |                   |          |            |       |                |

PCO: Palliative Care and Oncology

**Section VIII: Attitude** /7

9) Do you agree with the following statements about the role of PC?

|                                                                                                                               | Strongly disagree | Disagree | Don't know | Agree | Strongly agree |
|-------------------------------------------------------------------------------------------------------------------------------|-------------------|----------|------------|-------|----------------|
| a) I likely to refer my patient to PMT when cancer is first diagnosed.                                                        |                   |          |            |       |                |
| b) I have an ethical obligation to provide EoL care to my patient with terminal cancer rather than PMT.                       |                   |          |            |       |                |
| c) I only refer my patient to PCC at the time of impending death                                                              |                   |          |            |       |                |
| d) Referring my patient to PMT makes me lose hope                                                                             |                   |          |            |       |                |
| e) I believe the response of PMT to referrals is slow.                                                                        |                   |          |            |       |                |
| f) I think the criteria of PC referral is so restrictive to meet my patient' needs.                                           |                   |          |            |       |                |
| g) I believe there is a need to educate patients, caregivers and even healthcare providers about the potential benefits of PC |                   |          |            |       |                |

*PC: Palliative Care, PMT: Palliative Medicine team, EoL:End of Life, PCO: Palliative Care and Oncology, PCC: Palliative Care Center*

**Section IX: Satisfaction** /7

11) To what extent are you satisfied with ....?

|                                         | Very dissatisfied | Dissatisfied | Neither satisfied nor dissatisfied | satisfied | Very satisfied |
|-----------------------------------------|-------------------|--------------|------------------------------------|-----------|----------------|
| a) Availability of PC services          |                   |              |                                    |           |                |
| b) Accessibility of PC services         |                   |              |                                    |           |                |
| c) Acceptability of PC services         |                   |              |                                    |           |                |
| d) Continuity of PC services            |                   |              |                                    |           |                |
| e) Quality of PC services               |                   |              |                                    |           |                |
| f) Cost impact of PC services           |                   |              |                                    |           |                |
| g) The overall services provided by PMT |                   |              |                                    |           |                |

12) Do you think that the PMT services needs to be improved?

- a) No
- b) Yes (kindly indicate how.....  
 .....  
 .....  
 .....)

*PC: Palliative Care, PMT: Palliative Medicine team*
