# Supplementary material for: Development and validation of impact of early integration of palliative care and oncology(IEI PCO) questionnaire: a survey for medical oncologists and nurses
Source: PubMed Central journal article supplement (PMC11046835; doi:10.1186/s12904-024-01435-1), 2024-04-26
Supplement: 12904_2024_1435_MOESM3_ESM.pdf [file 12904_2024_1435_MOESM3_ESM.pdf]

**Table (1S) Calculation of Item-Content Validity Items (I-CVI) for items of end-of-life care dimension during the first round of judgment**

| Items | Relevant<br>(rating 3 or 4) | Not relevant<br>(rating 1 or 2) | I-CVIs*  | Interpretation  |
|-------|-----------------------------|---------------------------------|----------|-----------------|
| 1     | 10                          | 1                               | 0.909091 | Appropriate     |
| 2     | 6                           | 5                               | 0.545455 | Not Appropriate |
| 3     | 11                          | 0                               | 1        | Appropriate     |
| 4     | 9                           | 2                               | 0.818182 | Appropriate     |
| 5     | 8                           | 3                               | 0.727273 | Need Revision   |
| 6     | 11                          | 0                               | 1        | Appropriate     |
| 7     | 10                          | 1                               | 0.909091 | Appropriate     |
| 8     | 9                           | 2                               | 0.818182 | Appropriate     |
| 9     | 8                           | 3                               | 0.727273 | Need Revision   |
| 10    | 7                           | 4                               | 0.636364 | Not Appropriate |

\*Item-Content Validity Items, Number of experts=11, Interpretation of I-CVIs: If the I-CVI is higher than 79 percent, the item will be appropriate. If it is between 70 and 79 percent, it needs revision. If it is less than 70 percent, it is eliminated.

**Table (2S) Calculating of Content Validity Ratio (CVR) for a sample of instrument items for items of symptomatic management dimension during the first round of judgment**

| Items | Ne* | CVR**       | Interpretation |
|-------|-----|-------------|----------------|
| 1     | 7   | 0.27272727  | Eliminated     |
| 2     | 5   | -0.09090909 | Eliminated     |
| 3     | 10  | 0.81818182  | Remained       |
| 4     | 9   | 0.63636364  | Remained       |
| 5     | 6   | 0.09090909  | Eliminated     |
| 6     | 8   | 0.45454545  | Eliminated     |
| 7     | 4   | -0.27272727 | Eliminated     |
| 8     | 11  | 1           | Remained       |
| 9     | 9   | 0.63636364  | Remained       |
| 10    | 8   | 0.45454545  | Eliminated     |

\* Ne: Number of experts evaluated the item essential, CVR: content validity ratio

\*\*CVR or Content Validity Ratio =  $(N_e - N/2) / (N/2)$  with 11 person at the expert panel (N=11), the items with the CVR bigger than 0.59 remained at the instrument and the rest eliminated.

**Table (3S): Differences in symptom control, communication and end of life care between oncologists and nurses before and after palliative care and oncology (PCO) integration**

|                                                |         | Doctors  |         | Nurses  |         | P Value | Total    |         |
|------------------------------------------------|---------|----------|---------|---------|---------|---------|----------|---------|
|                                                |         | Mean     | SD      | Mean    | SD      |         | Mean     | SD      |
| <b>Section IV:<br/>Symptom<br/>Control</b>     | After   | 38.9231  | 4.55021 | 38.0382 | 4.38249 | 0.274   | 38.2412  | 4.42365 |
|                                                | Before  | 22.6667  | 6.74472 | 29.7786 | 8.22406 | <0.001  | 28.1471  | 8.44100 |
|                                                | Diff    | 16.25641 | 7.54188 | 8.25954 | 9.11599 | <0.001  | 10.09412 | 9.38540 |
|                                                | P value | <0.001   |         | <0.001  |         |         | <0.001   |         |
| <b>Section V:<br/>Communication<br/>skills</b> | After   | 21.6154  | 2.07257 | 21.4198 | 2.62811 | 0.629   | 21.4647  | 2.50714 |
|                                                | Before  | 15.0256  | 4.04245 | 17.7557 | 4.55410 | <0.001  | 17.1294  | 4.57751 |
|                                                | Diff    | 6.58974  | 4.83800 | 3.66412 | 4.40386 | <0.001  | 4.33529  | 4.65870 |
|                                                | P value | <0.001   |         | <0.001  |         |         | <0.001   |         |
| <b>Section VI:<br/>End of Life</b>             | After   | 30.7436  | 3.53716 | 29.1450 | 2.64901 | 0.012   | 29.5118  | 2.94373 |
|                                                | Before  | 19.4103  | 5.06130 | 20.8855 | 5.42167 | 0.132   | 20.5471  | 5.36266 |
|                                                | Diff    | 11.33333 | 5.38191 | 8.25954 | 5.74535 | 0.003   | 8.96471  | 5.79522 |
|                                                | P value | <0.001   |         | <0.001  |         |         | <0.001   |         |
