# Supplementary material for: Development and validation of impact of early integration of palliative care and oncology(IEI PCO) questionnaire: a survey for medical oncologists and nurses
Source: PubMed Central journal article supplement (PMC11046835; doi:10.1186/s12904-024-01435-1), 2024-04-26
Supplement: 12904_2024_1435_MOESM4_ESM.pdf [file 12904_2024_1435_MOESM4_ESM.pdf]

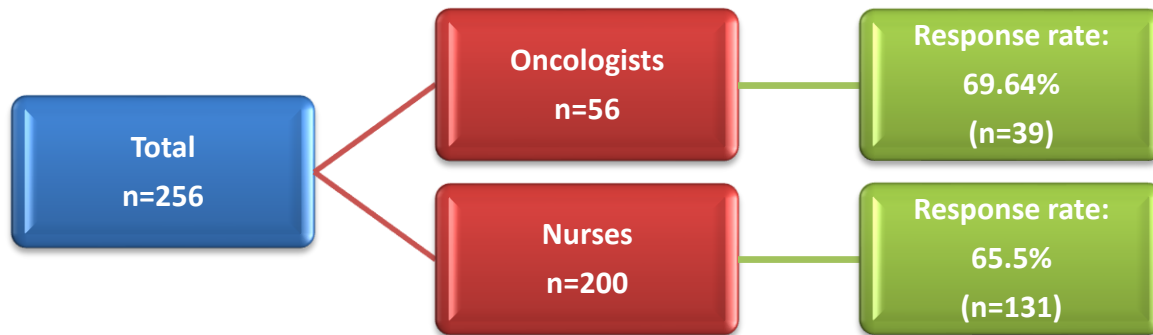

**Figure (1S):** Flowchart for distribution of Impact of Early Integration of Palliative Care and Oncology''(IEI PCO survey)

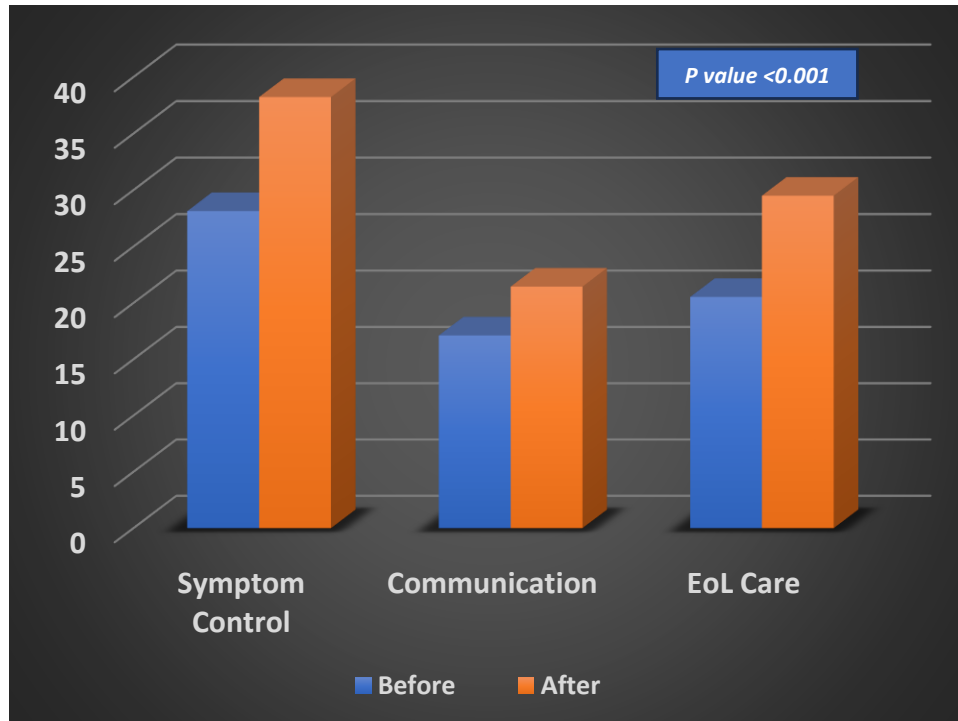

**Figure (2S): Paired t-test Comparison between symptom control, communication and End of life care before and after PCO integration**

*EOL: End of life, PCO: Palliative Care Oncology*
